# Supplementary material for: Fully biodegradable and biocompatible emulsion templated polymer scaffolds by thiol-acrylate polymerization of polycaprolactone macromonomers
Source: Royal Society of Chemistry journal article supplement (doi:10.1039/c5py00721f), 2015-01-01
Supplement: c5py00721f1.pdf [file c5py00721f1.pdf]

## **Supplementary Information**

### **Fully Biodegradable and Biocompatible Emulsion Templated Polymer Scaffolds by Thiol-Acrylate Polymerization of Polycaprolactone Macromonomers**

D. W. Johnson, C. R. Langford, M. P. Didsbury, B. Lipp, S. A. Przyborski and N. R. Cameron

## PCL Triacrylate Characterisation

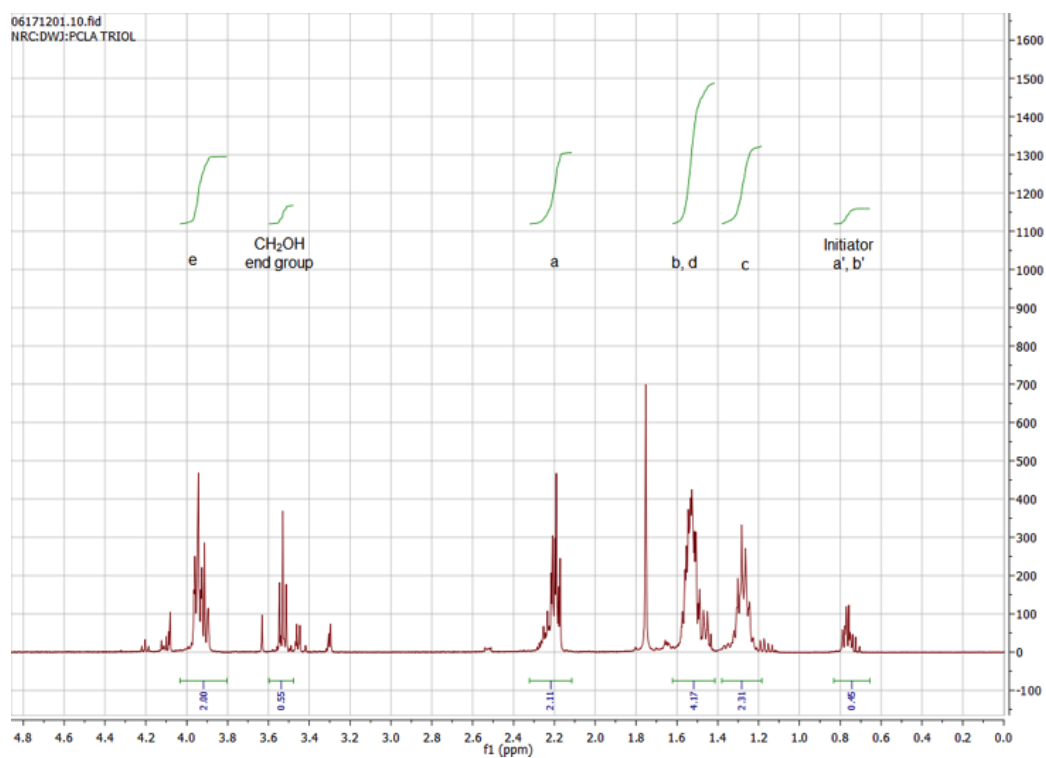

**Figure S1.** <sup>1</sup>H NMR spectrum of PCL triol precursor

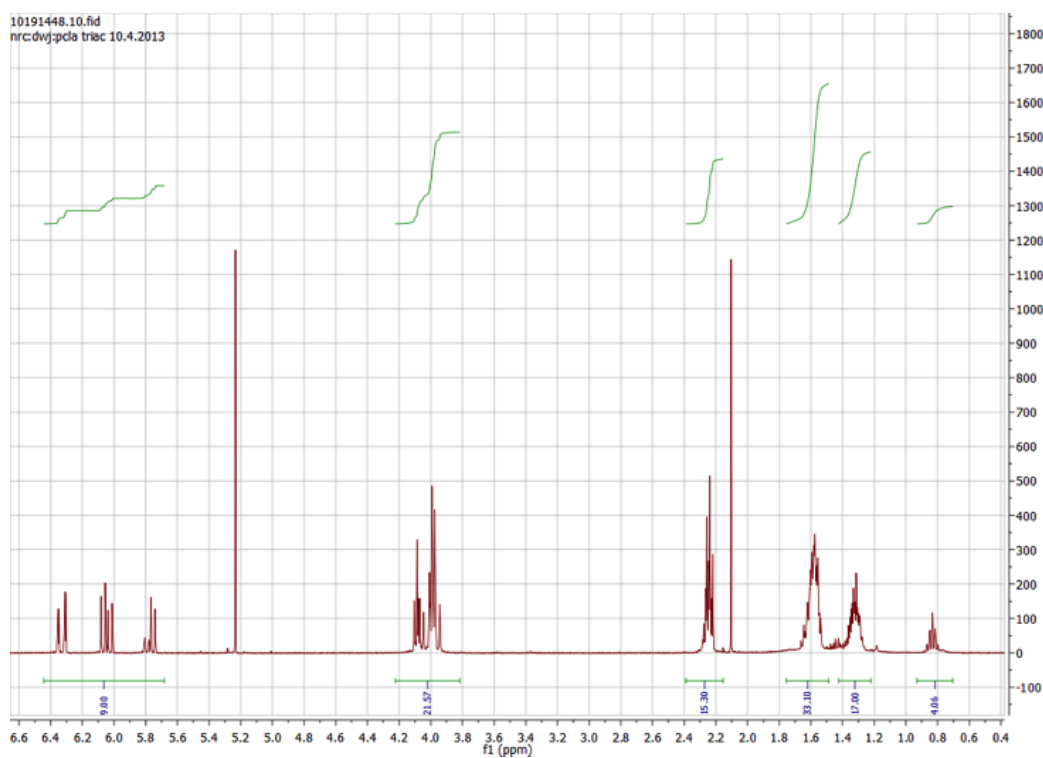

**Figure S2.** <sup>1</sup>H NMR spectrum of acrylated PCL triol

## Characterisation of Scaffold Degradation Products

### DPEHA scaffold

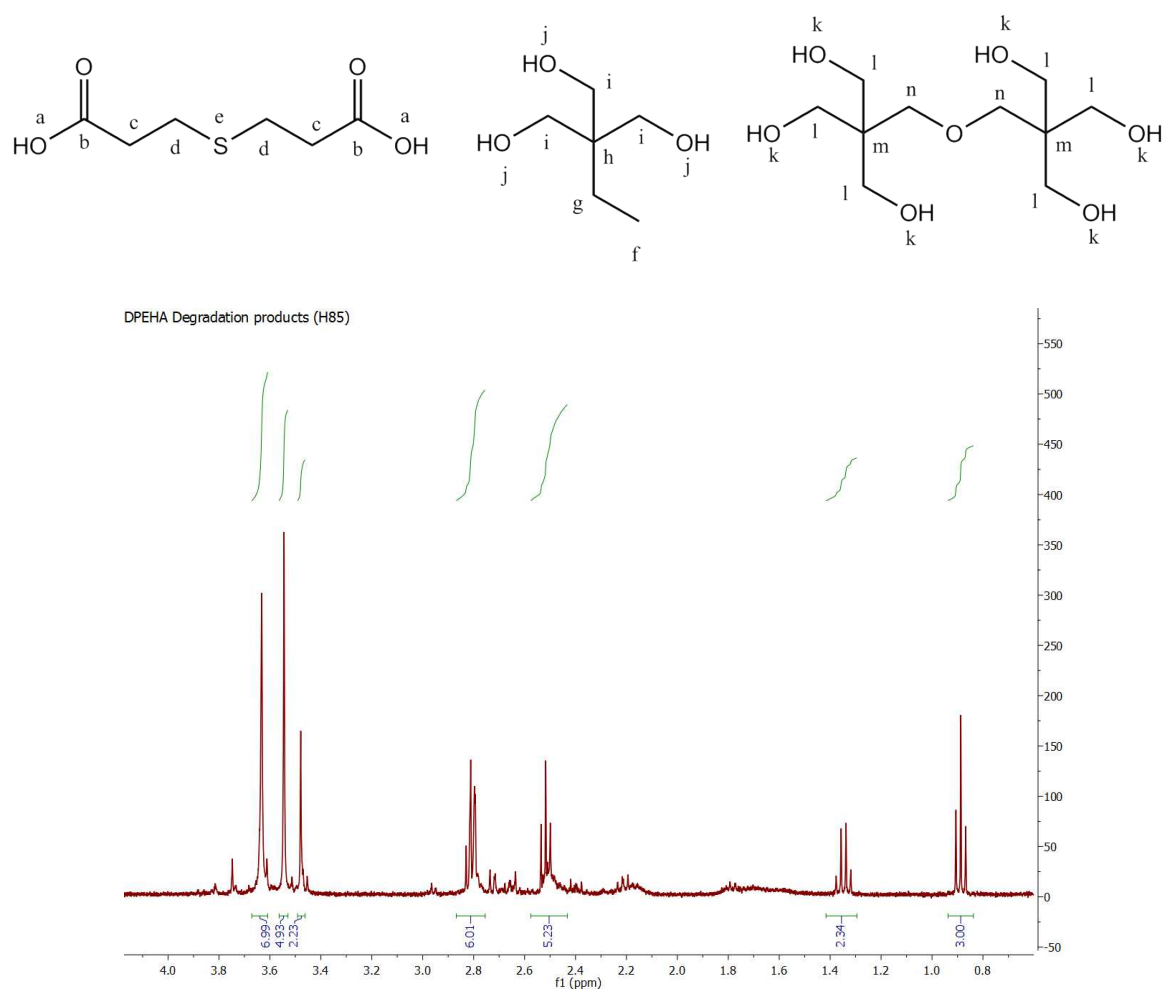

**Figure S3.**  $^1\text{H}$  NMR spectrum of DPEHA scaffold degradation products

**Table S1.** Assignment of DPEHA scaffold degradation products  $^1\text{H}$  NMR spectrum

| $\delta$ (ppm) | Multiplicity  | Theor. Integral | Actual Integral | Assignment |
|----------------|---------------|-----------------|-----------------|------------|
| 0.89           | triplet       | 3               | 3.0             | f          |
| 1.34           | quadruplet    | 2               | 2.3             | g          |
| 2.52           | broad triplet | 5               | 5.2             | d          |
| 2.8            | broad triplet | 5               | 6.0             | c          |
| 3.48           | singlet       | 2               | 2.2             | n          |
| 3.54           | singlet       | 5               | 4.9             | l          |
| 3.63           | singlet       | 6               | 7.0             | i          |

### PCL triacrylate scaffold

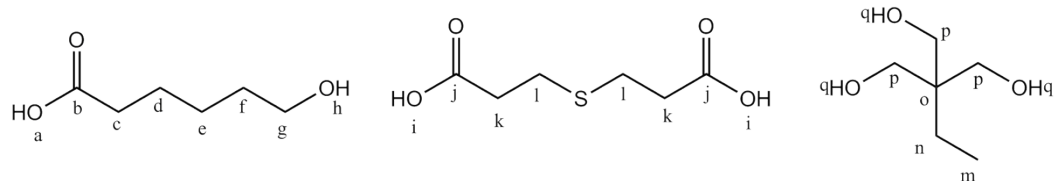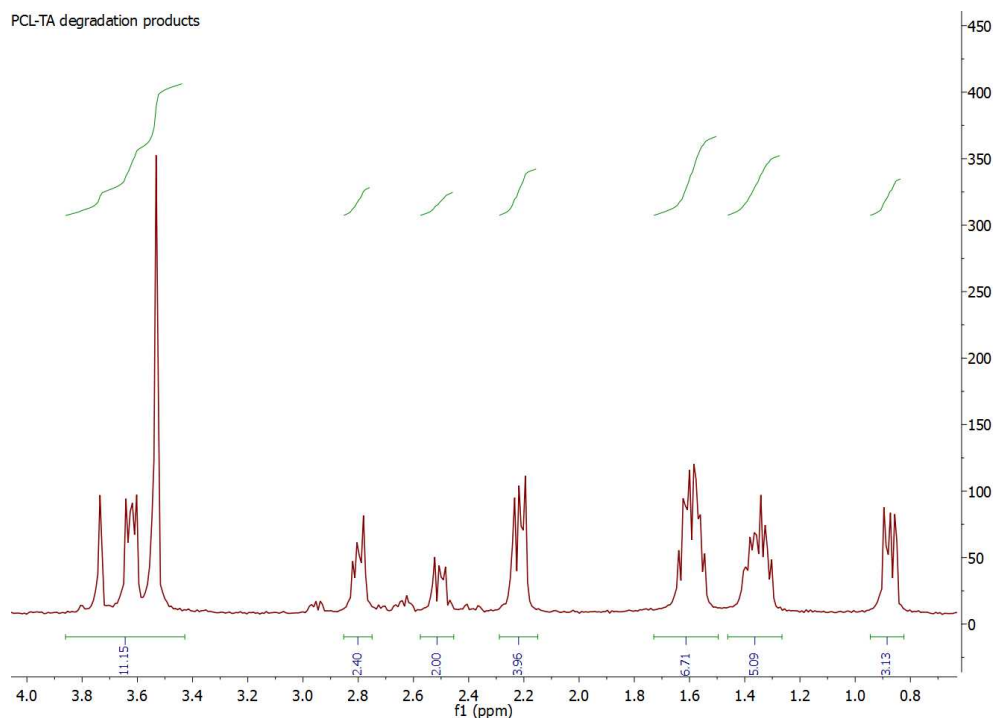

**Figure S4.** <sup>1</sup>H NMR spectrum of PCL triacrylate scaffold degradation products

**Table S2. Assignment of PCL triacrylate scaffold degradation products <sup>1</sup>H NMR spectrum**

| δ (ppm)             | Multiplicity     | Theo. integral* | Actual integral | Assignment |
|---------------------|------------------|-----------------|-----------------|------------|
| 0.87                | broad triplet    | 4               | 4.0             | m          |
| 1.36 & 1.6          | broad multiplets | 9               | 6.5             | n, d, e, f |
| 2.2                 | multiplet        | 3               | 5.1             | c          |
| 2.5                 | broad multiplet  | 2               | 2.6             | l          |
| 2.8                 | broad multiplet  | 2               | 3.1             | k          |
| 3.55, 3.62 and 3.74 | broad multiplets | 8               | 14.1            | p,g        |

\* proper assignment is not possible where peaks of different products overlap as the stoichiometry of the degradation products is not known (PCL has a broad dispersity).

# TMPTA scaffold

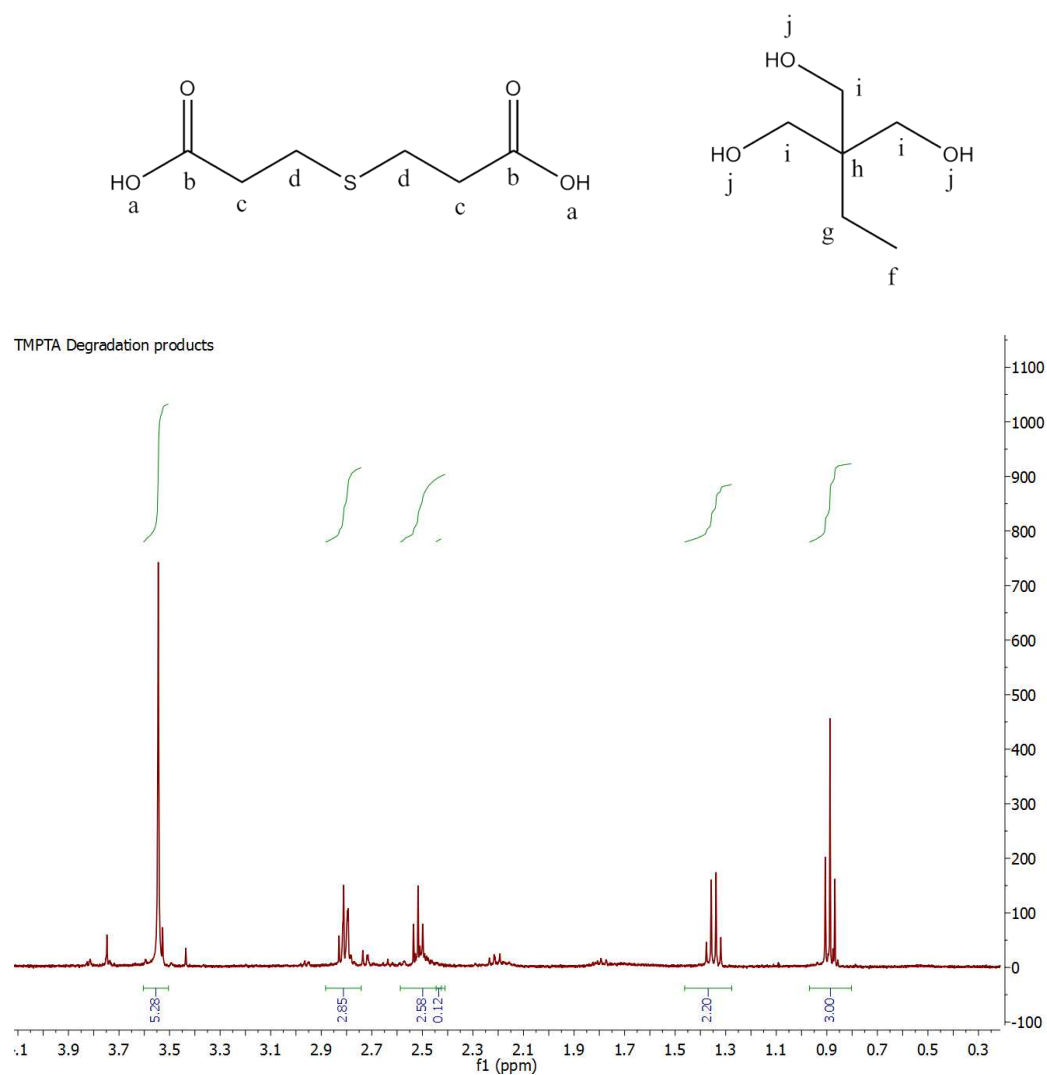

**Figure S5.**  $^1\text{H}$  NMR spectrum of TMPTA scaffold degradation products

**Table S3.** Assignment of TMPTA scaffold degradation products  $^1\text{H}$  NMR spectrum

| $\delta$ (ppm) | Multiplicity  | Theo. integral | Actual integral | Assignment |
|----------------|---------------|----------------|-----------------|------------|
| 0.87           | triplet       | 3              | 3.0             | f          |
| 1.30           | quadruplet    | 2              | 2.2             | g          |
| 2.52           | broad triplet | 3              | 2.6             | c          |
| 2.85           | broad triplet | 3              | 2.9             | d          |
| 3.5            | singlet       | 5              | 5.3             | i          |
